# Supplementary material
Source: ML conference proceedings conference paper supplement (https://proceedings.neurips.cc/paper_files/paper/2021/hash/89fcd07f20b6785b92134bd6c1d0fa42-Abstract.html)
Supplement: Supplementary file [file 89fcd07f20b6785b92134bd6c1d0fa42-Supplemental.pdf]

# DROID-SLAM: Supplementary Material

## A Additional Results

|                 | MH01         | MH02         | MH03         | MH04         | MH05         | V101         | V102         | V103         | V201         | V202         | V203         | Avg          |
|-----------------|--------------|--------------|--------------|--------------|--------------|--------------|--------------|--------------|--------------|--------------|--------------|--------------|
| D3VO + DSO [6]  | -            | -            | 0.08         | -            | 0.09         | -            | -            | 0.11         | -            | 0.05         | -            | -            |
| ORB-SLAM2 [4]   | 0.035        | 0.018        | 0.028        | 0.119        | 0.060        | <b>0.035</b> | 0.020        | 0.048        | 0.037        | 0.035        | -            | -            |
| VINS-Fusion [5] | 0.540        | 0.460        | 0.330        | 0.780        | 0.500        | 0.550        | 0.230        | -            | 0.230        | 0.200        | -            | -            |
| SVO [3]         | 0.040        | 0.070        | 0.270        | 0.170        | 0.120        | 0.040        | 0.040        | 0.070        | 0.050        | 0.090        | 0.790        | 0.159        |
| ORB-SLAM3 [2]   | 0.029        | 0.019        | <b>0.024</b> | 0.085        | 0.052        | <b>0.035</b> | 0.025        | 0.061        | 0.041        | 0.028        | 0.521        | 0.084        |
| Ours            | <b>0.015</b> | <b>0.013</b> | 0.035        | <b>0.048</b> | <b>0.040</b> | 0.037        | <b>0.011</b> | <b>0.020</b> | <b>0.018</b> | <b>0.015</b> | <b>0.017</b> | <b>0.024</b> |

Table 1: Stereo SLAM on the EuRoC datasets, ATE[m].

We provide stereo results on the EuRoC dataset[1] in Tab. 1 using our network trained on synthetic, monocular video. In the stereo setting, it is possible to recover the trajectory of the camera up to scale. Compared to ORB-SLAM3[2] we reduce the average ATE by 71%.

## B Ablations

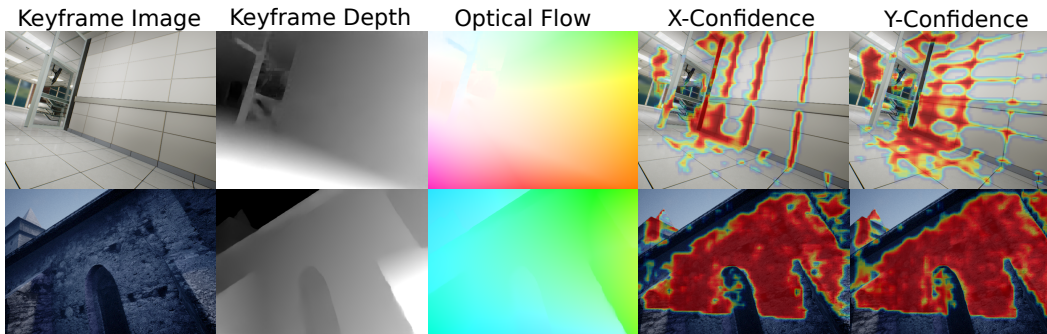

Figure 1: Visualizations of keyframe image, depth, flow and confidence estimates.

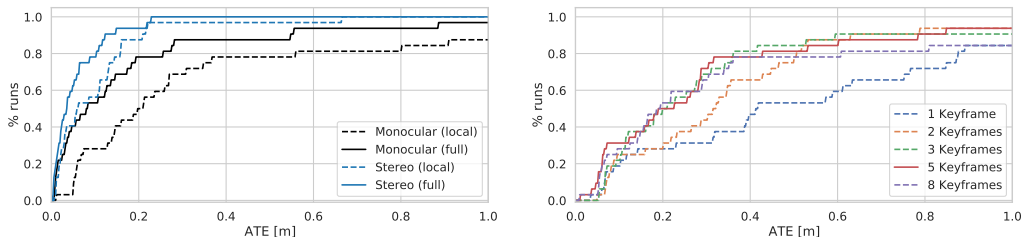

Figure 2: (Left) we show the performance of the system with different inputs (monocular vs. stereo) and whether global optimization is performed in addition to local BA (local vs. full). (Right) Tracking accuracy as a function of the number of keyframes. We use 5 keyframes (bold) in our experiments.

**Ablations** We ablate various design choices regarding our SLAM system and network architecture. Ablations are performed on our validation split of the TartanAir dataset. In Fig. 1 we show visualizations on the validation set of keyframe depth estimates alongside optical flow and associated confidence weights.

In Fig.2 (left) we show how the system benefits from both stereo video and global optimization. Although our network is only trained on monocular video, it can readily leverage stereo frames if available. In Fig. 2 (right) we show how the number of keyframe affects odometry performance. In Fig. 3 we ablate components of the network architecture. Fig. 3 (left) shows the impact of using global context in the GRU through spatial pooling while 3 (right) demonstrates the importance of

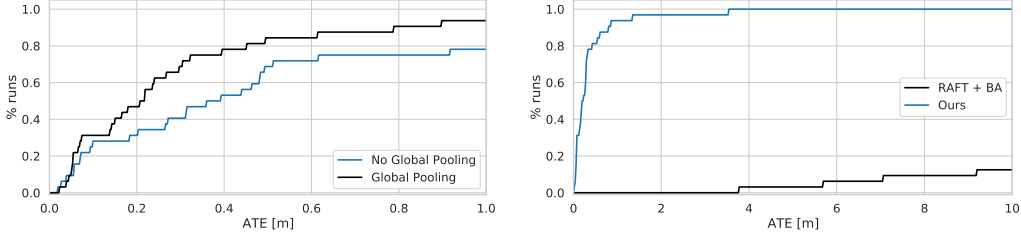

Figure 3: (Left) Impact of global context in the update operator. (Right) Impact of using the bundle adjustment layer during training vs training directly on optical flow, then applying BA at test time.

16 training with DBA as opposed to training on flow and applying BA at inference. We find that the  
 17 SLAM system is unstable and prone to failure if the DBA is not used during training.

## 18 C Camera Model and Jacobians

19 We represent 3D points using homogeneous coordinates  $\mathbf{X} = (X, Y, Z, W)^T$ . An image point  $\mathbf{p}$   
 20 with inverse depth  $d$  is re-projected from frame  $i$  into frame  $j$  according to the warping function

$$\mathbf{p}' = \Pi_c(\mathbf{G}_{ij} \cdot \Pi_c^{-1}(\mathbf{p}, d)) \quad \mathbf{G}_{ij} = \mathbf{G}_j \circ \mathbf{G}_i^{-1} \quad (1)$$

21 where  $\Pi_c$  is the pinhole projection function, and  $\Pi_c^{-1}$  is the inverse projection

$$\Pi_c(\mathbf{X}) = \begin{pmatrix} f_x \frac{X}{Z} + c_x \\ f_y \frac{Y}{Z} + c_y \end{pmatrix} \quad \Pi_c^{-1}(\mathbf{p}, d) = \begin{pmatrix} \frac{p_x - c_x}{f_x} \\ \frac{p_y - c_y}{f_y} \\ 1 \\ d \end{pmatrix}. \quad (2)$$

22 given camera intrinsic parameters  $c = (f_x, f_y, c_x, c_y)$ .

23 For optimization, we need the Jacobians with respect to  $\mathbf{G}_i$ ,  $\mathbf{G}_j$ , and  $d$ . We use the local parameteri-  
 24 zation  $e^{\xi_i} \mathbf{G}_i$  and  $e^{\xi_j} \mathbf{G}_j$  and treat  $d$  as a vector in  $\mathbb{R}^1$ . The Jacobians of the projection and inverse  
 25 projection functions are given as

$$\frac{\partial \Pi_c(\mathbf{X})}{\partial \mathbf{X}} = \begin{pmatrix} f_x \frac{1}{Z} & 0 & -f_x \frac{X}{Z^2} & 0 \\ 0 & f_y \frac{1}{Z} & -f_y \frac{Y}{Z^2} & 0 \end{pmatrix} \quad \frac{\partial \Pi_c^{-1}(\mathbf{p}, d)}{\partial d} = \begin{pmatrix} 0 \\ 0 \\ 0 \\ 1 \end{pmatrix}. \quad (3)$$

26 Using the local parameterization, we compute the Jacobian of the 3D point transformation

$$\mathbf{X}' = \text{Exp}(\xi_j) \cdot \mathbf{G}_j \cdot (\text{Exp}(\xi_i) \cdot \mathbf{G}_i)^{-1} \cdot \mathbf{X} = \text{Exp}(\xi_j) \cdot \mathbf{G}_j \cdot \mathbf{G}_i^{-1} \cdot \text{Exp}(-\xi_i) \cdot \mathbf{X} \quad (4)$$

27 using the adjoint operator to move the  $\xi_i$  term to the front of the expression

$$\mathbf{X}' = \text{Exp}(\xi_j) \cdot \text{Exp}(-\text{Adj}_{\mathbf{G}_j \mathbf{G}_i^{-1}} \xi_i) \cdot \mathbf{G}_j \cdot \mathbf{G}_i^{-1} \cdot \mathbf{X} \quad (5)$$

28 allowing us to compute the Jacobians using the generators

$$\frac{\partial \mathbf{X}'}{\partial \xi_j} = \begin{pmatrix} W' & 0 & 0 & 0 & Z' & -Y' \\ 0 & W' & 0 & -Z' & 0 & X' \\ 0 & 0 & W' & Y' & -X' & 0 \\ 0 & 0 & 0 & 0 & 0 & 0 \end{pmatrix} \quad (6)$$

29

$$\frac{\partial \mathbf{X}'}{\partial \xi_i} = - \begin{pmatrix} W' & 0 & 0 & 0 & Z' & -Y' \\ 0 & W' & 0 & -Z' & 0 & X' \\ 0 & 0 & W' & Y' & -X' & 0 \\ 0 & 0 & 0 & 0 & 0 & 0 \end{pmatrix} \cdot \text{Adj}_{\mathbf{G}_j \mathbf{G}_i^{-1}} \quad (7)$$

30 Using the chain rule, we can compute the full Jacobians with respect to the variables

$$\frac{\partial \mathbf{p}'}{\partial \xi_j} = \frac{\partial \Pi_c(\mathbf{X}')}{\partial \mathbf{X}'} \frac{\partial \mathbf{X}'}{\partial \xi_j}, \quad \frac{\partial \mathbf{p}'}{\partial \xi_i} = \frac{\partial \Pi_c(\mathbf{X}')}{\partial \mathbf{X}'} \frac{\partial \mathbf{X}'}{\partial \xi_i} \quad (8)$$

31

$$\frac{\partial \mathbf{p}'}{\partial d} = \frac{\partial \Pi_c(\mathbf{X}')}{\partial \mathbf{X}'} \frac{\partial \mathbf{X}'}{\partial \mathbf{X}} \frac{\partial \Pi^{-1}(\mathbf{p}, d)}{\partial d} = \frac{\partial \Pi_c(\mathbf{X}')}{\partial \mathbf{X}'} = \frac{\partial \Pi_c(\mathbf{X}')}{\partial \mathbf{X}'} \begin{pmatrix} t_x \\ t_y \\ t_z \\ 1 \end{pmatrix} \quad (9)$$

32 where  $(t_x, t_y, t_z)$  is the translation vector of  $\mathbf{G}_j \circ \mathbf{G}_i^{-1}$ .

### 33 D Network Architecture

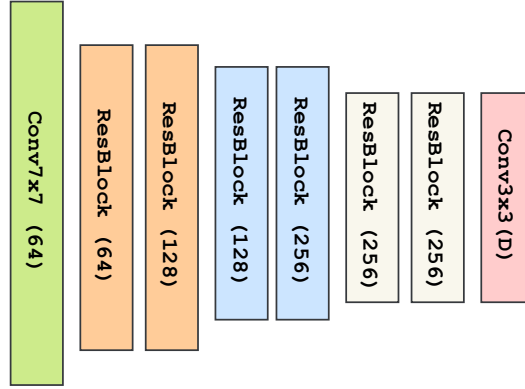

Figure 4: Architecture of the feature and context encoders. Both extract features at 1/8 the input image resolution using a set of 6 basic residual blocks. Instance normalization is used in the feature encoder; no normalization is used in the context encoder. The feature encoder outputs features with dimension  $D=128$  which the context encoder outputs features with dimension  $D=256$ .

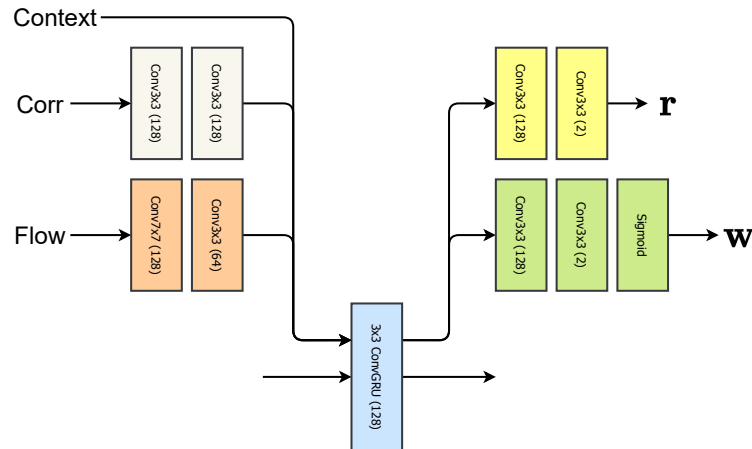

Figure 5: Architecture of the update operator. During each iteration, context, correlation, and flow features get injected into the GRU. The revision ( $r$ ) and confidence weights ( $w$ ) are predicted from the updated hidden state.

### 34 References

35 [1] M. Burri, J. Nikolic, P. Gohl, T. Schneider, J. Rehder, S. Omari, M. W. Achtelik, and R. Siegwart. The euroc  
36 micro aerial vehicle datasets. *The International Journal of Robotics Research*, 35(10):1157–1163, 2016.

- 37 [2] C. Campos, R. Elvira, J. J. G. Rodríguez, J. M. Montiel, and J. D. Tardós. Orb-slam3: An accurate  
38 open-source library for visual, visual-inertial and multi-map slam. *arXiv preprint arXiv:2007.11898*, 2020.
- 39 [3] C. Forster, Z. Zhang, M. Gassner, M. Werlberger, and D. Scaramuzza. Svo: Semidirect visual odometry for  
40 monocular and multicamera systems. *IEEE Transactions on Robotics*, 33(2):249–265, 2016.
- 41 [4] R. Mur-Artal and J. D. Tardós. Orb-slam2: An open-source slam system for monocular, stereo, and rgb-d  
42 cameras. *IEEE Transactions on Robotics*, 33(5):1255–1262, 2017.
- 43 [5] T. Qin and S. Shen. Online temporal calibration for monocular visual-inertial systems. In *2018 IEEE/RSJ*  
44 *International Conference on Intelligent Robots and Systems (IROS)*, pages 3662–3669. IEEE, 2018.
- 45 [6] N. Yang, L. v. Stumberg, R. Wang, and D. Cremers. D3vo: Deep depth, deep pose and deep uncertainty for  
46 monocular visual odometry. In *Proceedings of the IEEE/CVF Conference on Computer Vision and Pattern*  
47 *Recognition*, pages 1281–1292, 2020.
